# Supplementary material for: A Combination of Radiation and the Hypoxia-Activated Prodrug Evofosfamide (TH-302) is Efficacious against a Human Orthotopic Pancreatic Tumor Model
Source: PubMed Central journal article supplement — Transl Oncol. 2017 Jul 31;10(5):760–5. doi: 10.1016/j.tranon.2017.06.010 (PMC5538966; doi:10.1016/j.tranon.2017.06.010), 2017-07-31
Supplement: mmc1.pdf [file mmc1.pdf]

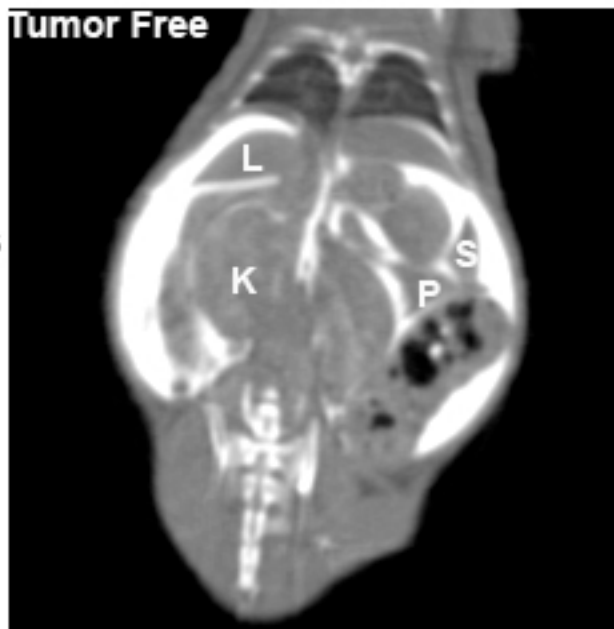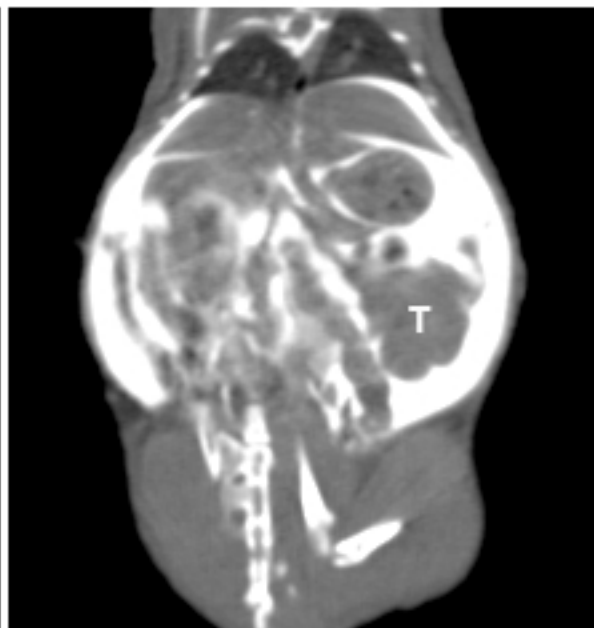

**Supplementary Figure 1 CT scans of normal and tumor bearing mice, obtained using IP injection of Iohexol (4 ml)**
