# Supplementary material for: A Combination of Radiation and the Hypoxia-Activated Prodrug Evofosfamide (TH-302) is Efficacious against a Human Orthotopic Pancreatic Tumor Model
Source: PubMed Central journal article supplement — Transl Oncol. 2017 Jul 31;10(5):760–5. doi: 10.1016/j.tranon.2017.06.010 (PMC5538966; doi:10.1016/j.tranon.2017.06.010), 2017-07-31

## Supplementary Figure 2 PIMO staining in AsPC1 tumors

ORIGINAL IMAGE

OTSU THRESHOLD APPLIED

ORIGINAL

OTSU

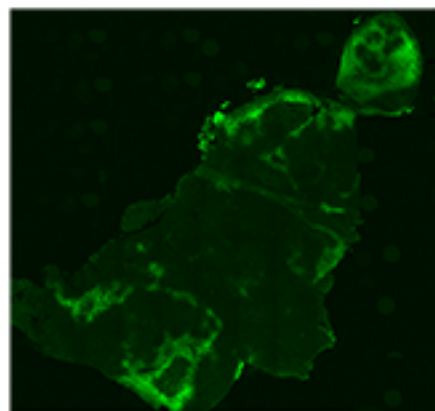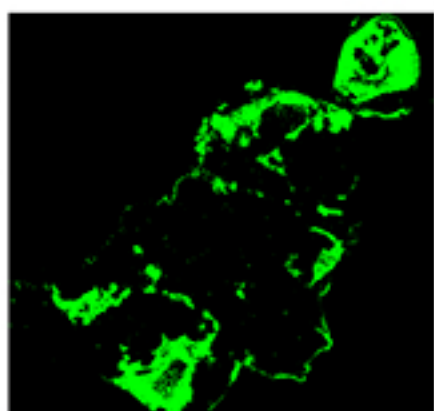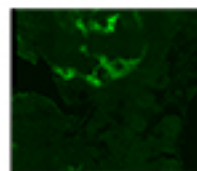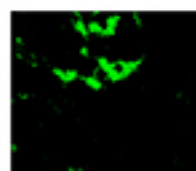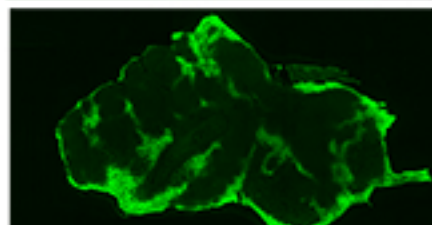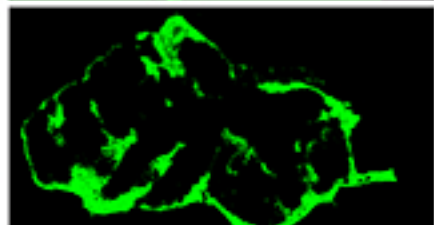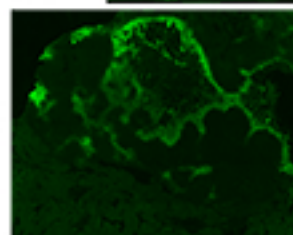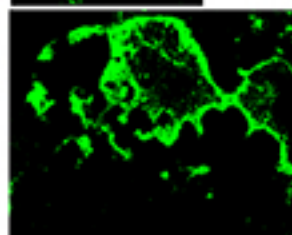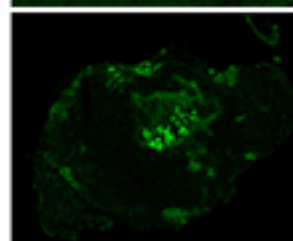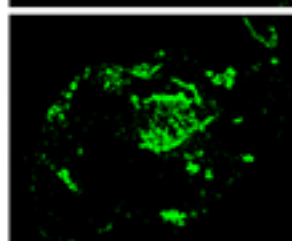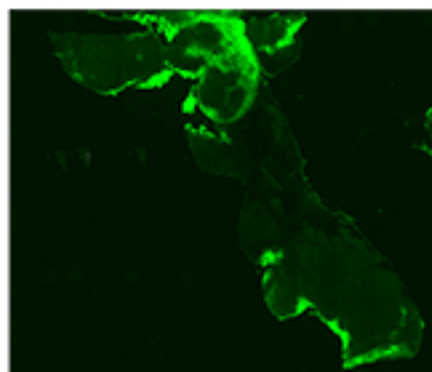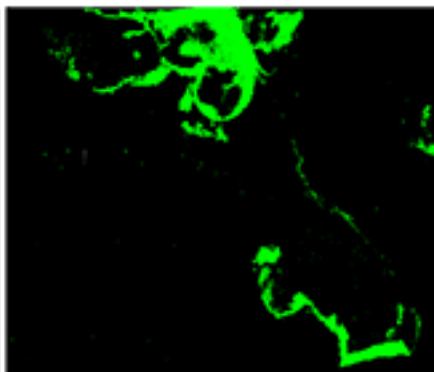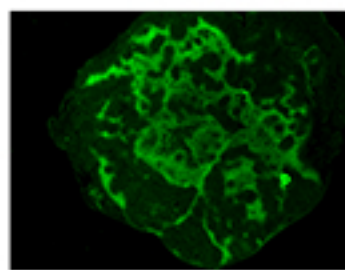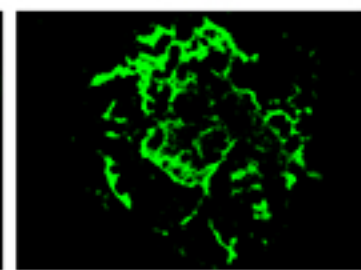

Supplement: mmc2.pdf [file mmc2.pdf]
